# Supplementary material
Source: PubMed Central journal article supplement (PMC3824130)
Supplement: mmc1.pdf [file mmc1.pdf]

The American Journal of Human Genetics, Volume 93

## **Supplemental Data**

### **Defects in the IFT-B Component IFT172 Cause**

#### **Jeune and Mainzer-Saldino Syndromes in Humans**

**Jan Halbritter, Albane A. Bizet, Miriam Schmidts, Jonathan D. Porath, Daniela A. Braun, Heon Yung Gee, Aideen M. McInerney-Leo, Pauline Krug, Emilie Filhol, Erica E. Davis, Rannar Airik, Peter G. Czarnecki, Anna M. Lehman, Peter Trnka, Patrick Nitschké, Christine Bole-Feysot, Markus Schueler, Bertrand Knebelmann, Stéphane Burtey, Attila J. Szabó, Kálmán Tory, Paul J. Leo, Brooke Gardiner, Fiona A. McKenzie, Andreas Zankl, Matthew A. Brown, Jane L. Hartley, Eamonn R. Maher, Chunmei Li, Michel R. Leroux, Peter J. Scambler, Shing H. Zhan, Steven J. Jones, Hülya Kayserili, Beyhan Tuysuz, Khemchand N. Moorani, Alexandru Constantinescu, Ian D. Krantz, Bernard S. Kaplan, Jagesh V. Shah, UK10K Consortium, Toby W. Hurd, Dan Doherty, Nicholas Katsanis, Emma L. Duncan, Edgar A. Otto, Philip L. Beales, Hannah M. Mitchison, Sophie Saunier, and Friedhelm Hildebrandt**

## Supplemental Acknowledgments

This study used data generated by the UK10K Consortium. A full list of investigators who contributed to generate this data is available at [www.uk10k.org](http://www.uk10k.org). Part of this work was funded by FORGE Canada Consortium: Finding of Rare Disease Genes in Canada (leader Kym Boycott, University of Ottawa), with sequencing services provided by Canada's Michael Smith Genome Sciences Centre, Vancouver, Canada.

This research was further supported by grants from the National Institutes of Health to Friedhelm Hildebrandt (DK068306 and DK090917), to Edgar A. Otto (DK090917), to Dan Doherty (R01NS064077), to Nicholas Katsanis (DK072301 and HD042601), and to Erica E. Davis (EY021872); from the "Agence Nationale de la Recherche" (ANR) (R09087KS and RPV11012KK), the "Fondation pour la Recherche Médicale" (DEQ20071210558) to Sophie Saunier, and an Action Medical Research UK Clinical Training Fellowship towards Miriam Schmidts (RTF-1411).

Friedhelm Hildebrandt is an Investigator of the Howard Hughes Medical Institute, a Doris Duke Distinguished Clinical Scientist, and a Warren E. Grupe Professor of Pediatrics. H.M.M. is funded by the Newlife Foundation for Disabled Children UK and Action Medical Research UK (GN1773, GN2101). Philip L. Beales is a Wellcome Trust Senior Research Fellow and receives funding from the European Community's Seventh Framework Program FP7/2009, under grant agreement no. 241955 SYSCILIA and Philip L. Beales and Miriam Schmidts received funds from the Dutch Kidney Foundation (CP11.18). The UK10K project is funded by the Wellcome Trust (Award WT091310). Sophie Saunier is an Investigator of the "Institut National de la Santé et de la Recherche Médicale" (INSERM) and Imagine Institute. Aideen M. McInerney-Leo is supported by a University of Queensland postgraduate student fellowship. Andreas Zankl is funded by the Royal Children's Hospital Foundation and ANZ Trustee's Children's Medical Research Establishment Grant. Matthew A. Brown is supported by a National Health and Medical Research Council Senior Principal Research Fellowship. Nicholas Katsanis is a distinguished Jean and George Brumley Professor. Attila Fintha (2nd Dep. of Pathology, Semmelweis University Budapest, Hungary) and Gábor Rudas (Semmelweis University Budapest, MR Research Center, Hungary) contributed to the generation of data, used in this study. We also acknowledge funding from CIHR (grant MOP-82870) to Michel R. Leroux.

The help of Ms. Mhairi Marshall, Ms. Jessica Harris, Ms. Sharon Song, Ms. Lisa Anderson, Mr. Atif Alsaedi, Mr. Jason Willer and discussion with Dr. Carol Wicking is gratefully acknowledged.

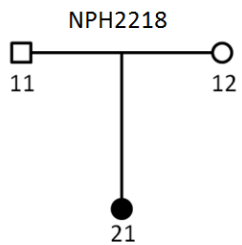

c.432delA  
p.[Lys144Asnfs\*76];[=]

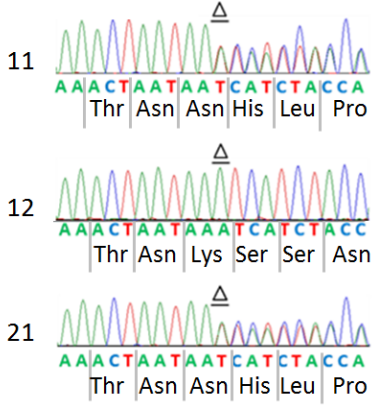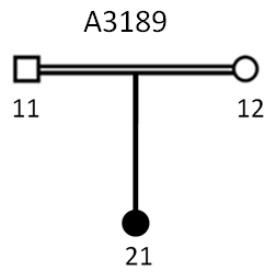

c.886C>T  
p.Arg296Trp

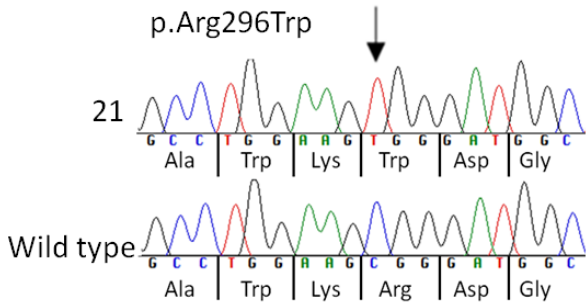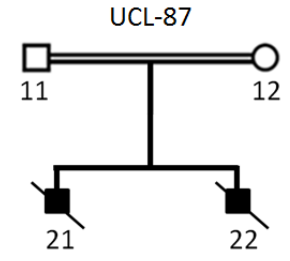

c.1232T>A  
p.Ile411Asn

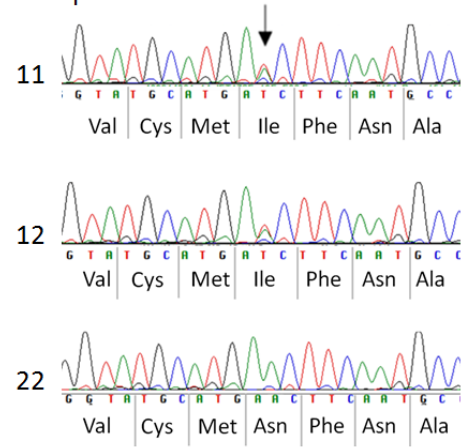

<sup>a</sup>  
c.4161G>A  
p.[Arg1387Serfs\*7];[=]

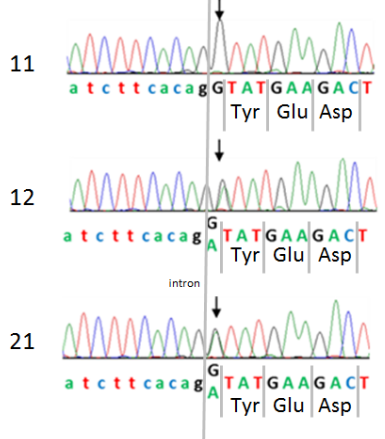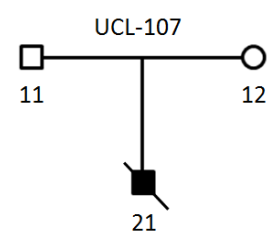

c.1232T>A  
p.Ile411Asn

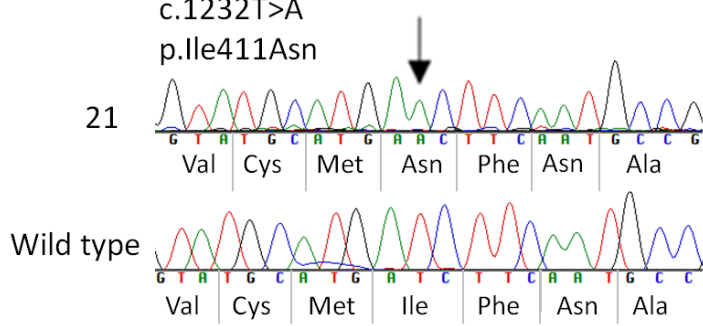

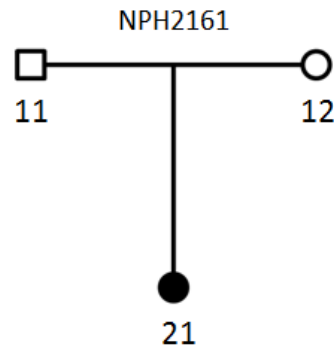

c.1390\_1395del  
p.[Asp464-Ile465del];[=]

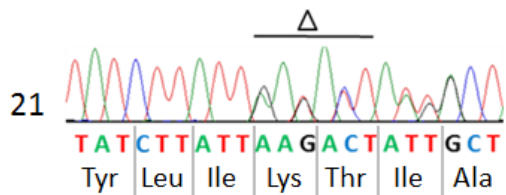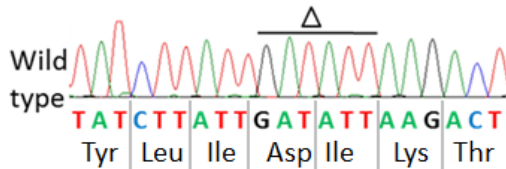

c.5179T>C  
p.[Cys1727Arg];[=]

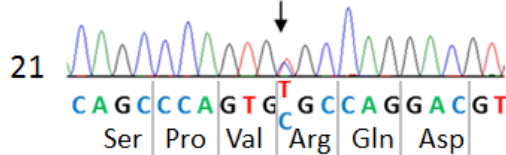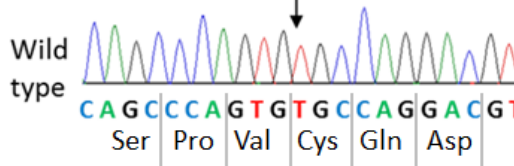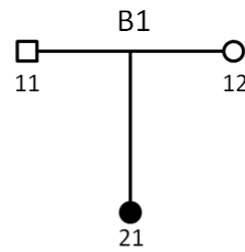

c.1671\_1672dupAG  
p.[Val558Gluufs\*12];[=]

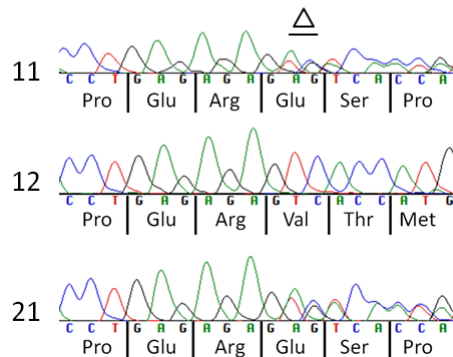

c.5179T>C  
p.[Cys1727Arg];[=]

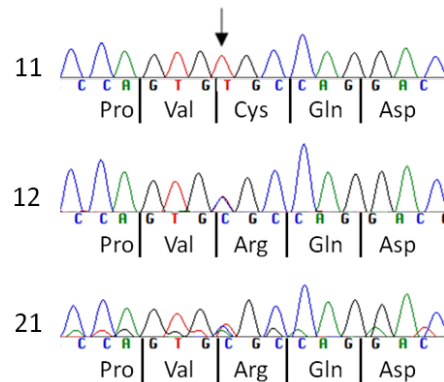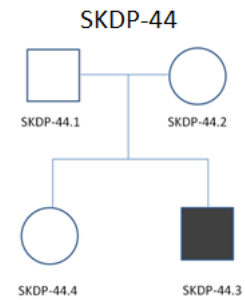

c.2158delC  
p.[Arg720Valfs\*28];[=]

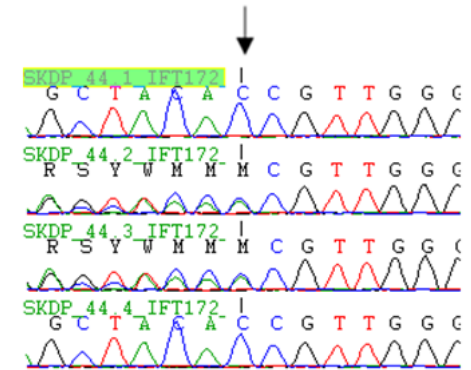

c.5179T>C  
p.[Cys1727Arg];[=]

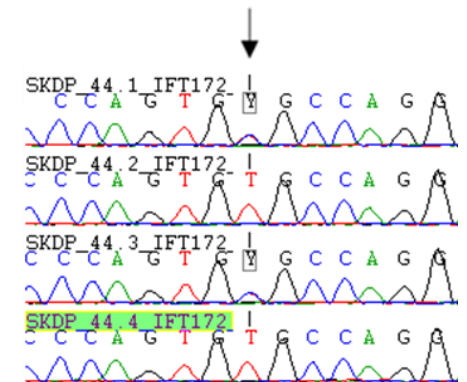

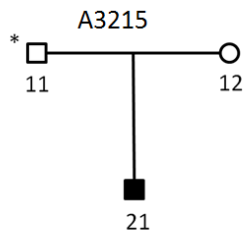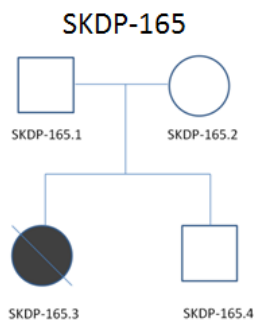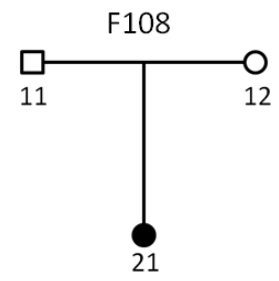

c.2716C>T  
p.[Gln906\*];[=]

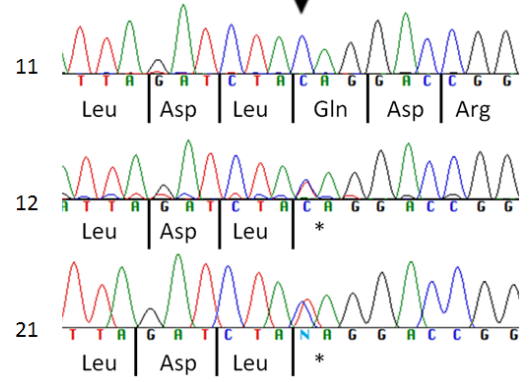

c.3907C>T  
p.[Arg1303\*];[=]

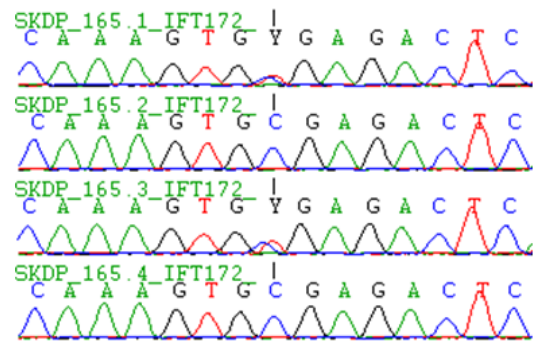

c.3228+1G>A  
[5' Splice site];[=]

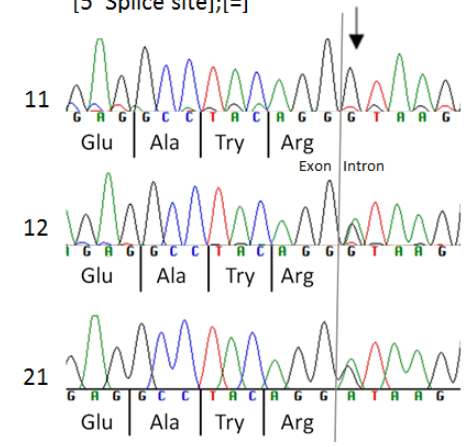

c.4607T>C  
p.[Leu1536Pro];[=]

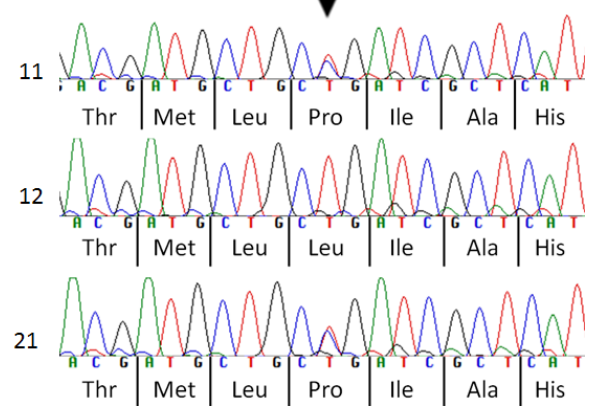

c.4630C>T  
p.[Arg1544Cys];[=]

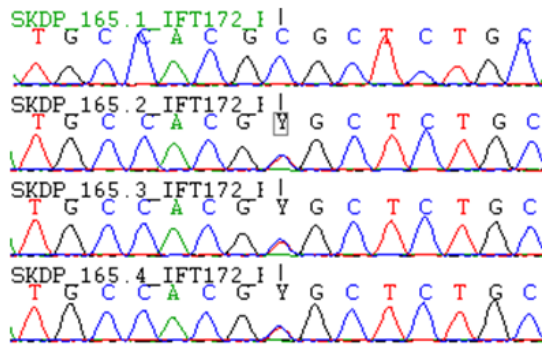

c.4607T>C  
p.[Leu1536Pro];[=]

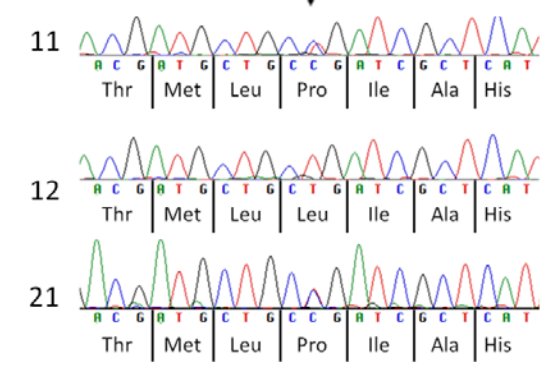

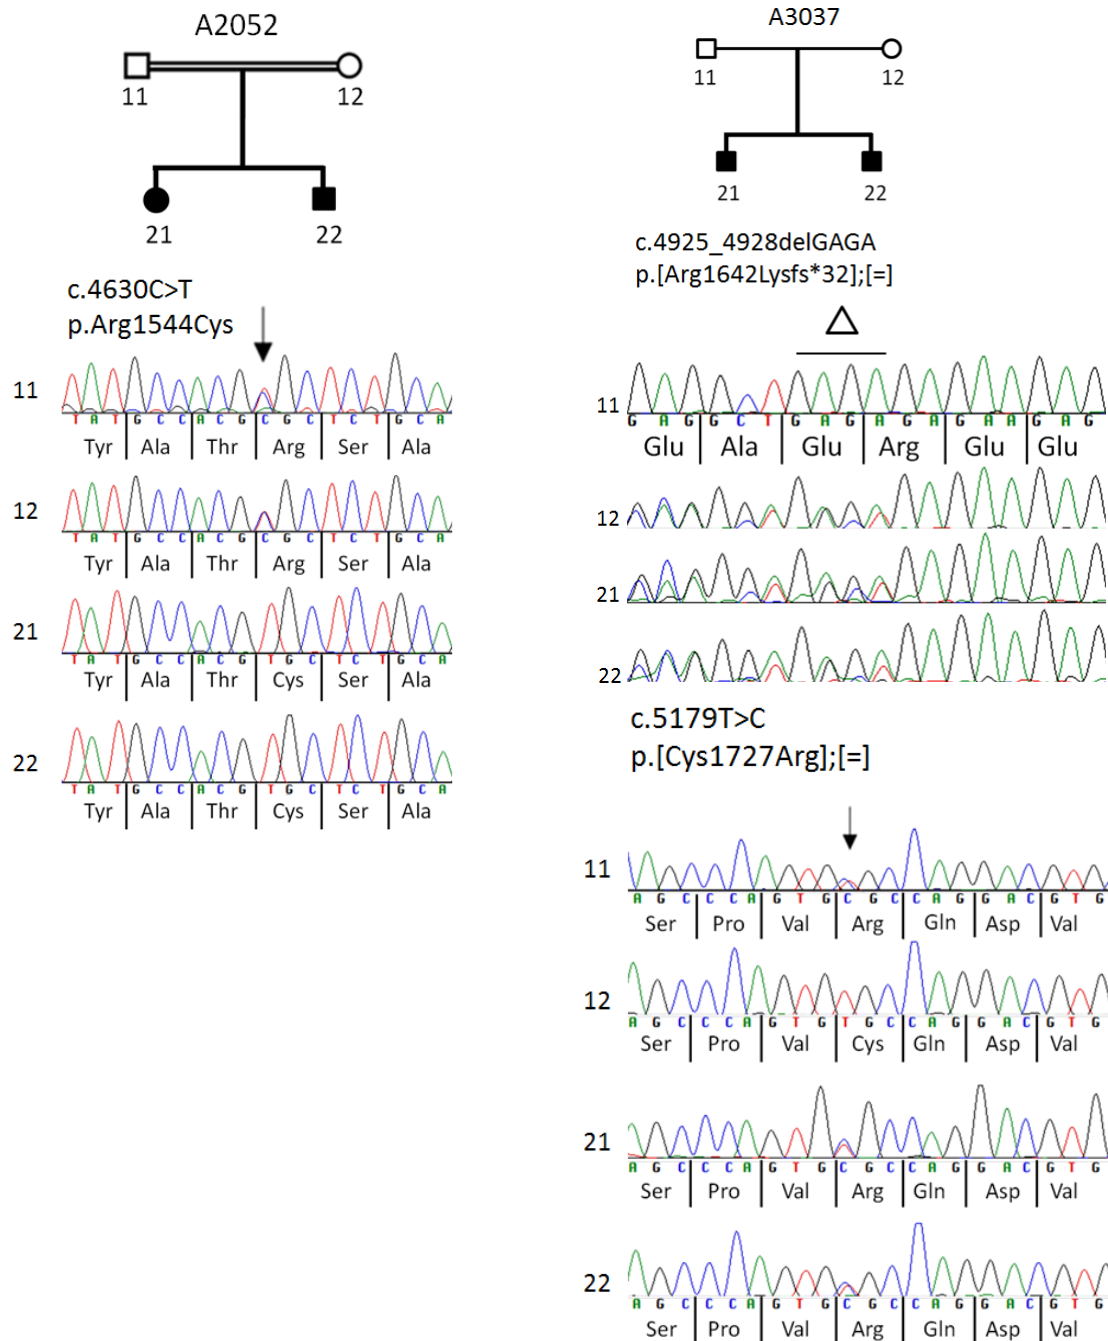

**Figure S1. Recessive mutations in *IFT172* in 12 families with skeletal ciliopathies.** Family numbers are shown above pedigrees. Mutation and predicted translational changes are indicated (see also **Table 1**). Sequencing traces are labelled according to the numbering in the family pedigree shown above. Where segregation was not available, sequence traces are shown for mutations above normal controls. Mutated nucleotide positions are indicated by arrows. Heterozygous mutations are bracketed, all others are homozygous. <sup>a</sup>Mutation results in exon skipping (see **Figure S2**). <sup>\*</sup>Father has different phenotype (ADPKD) without skeletal abnormalities.

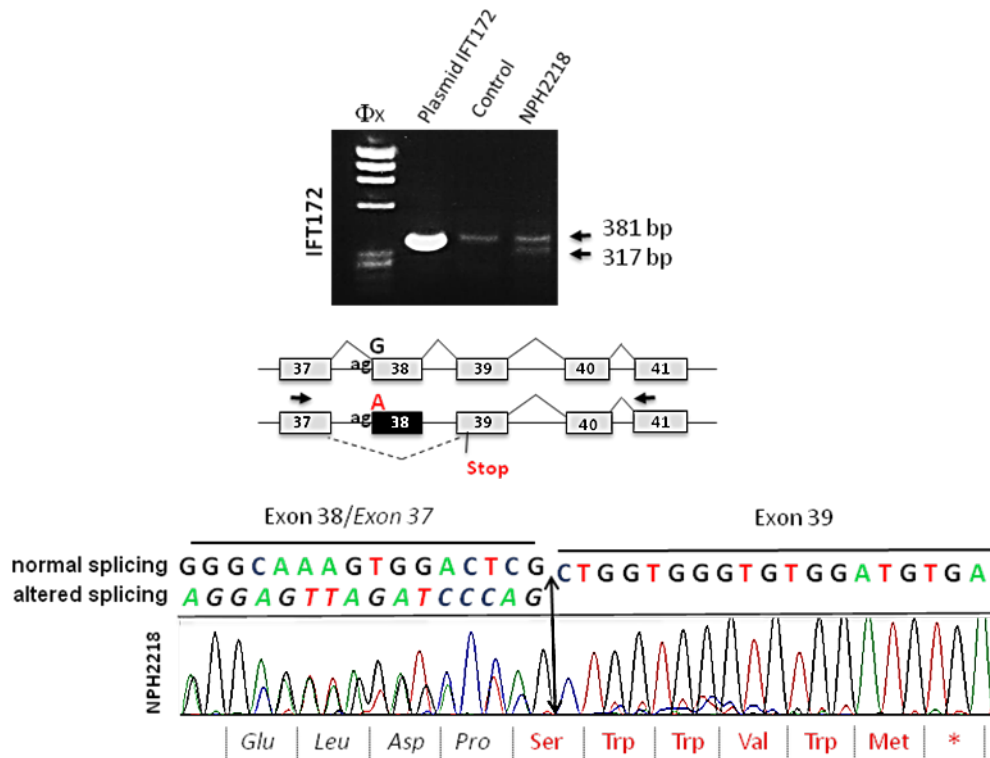

**Figure S2. Pathogenicity of the 3' splice site mutation c.4161G>A in individual NPH2218.** RT-PCR analysis of the *IFT172* transcript in patient NPH2218 fibroblasts harboring the c.4161G>A mutation in exon 38 and control individual using primers located in exons 37 and 41. In addition to the 381-bp band corresponding to normal splicing, a 317-bp band was detected from individual NPH2218 cDNA. Lane 1: Molecular weight marker *Fx174 HaeIII*; lane 2: PCR product from human *IFT172* plasmid; lane 3: RT-PCR product from control fibroblasts; lane 4: RT-PCR product from NPH2218 fibroblasts. Subsequent Sanger sequencing of the individual's (NPH2218) RT-PCR product revealed that the c.4161G>A mutation leads to aberrant splicing, with skipping of exon 38, resulting in a premature termination of the protein (p.Arg1387Serfs\*7).



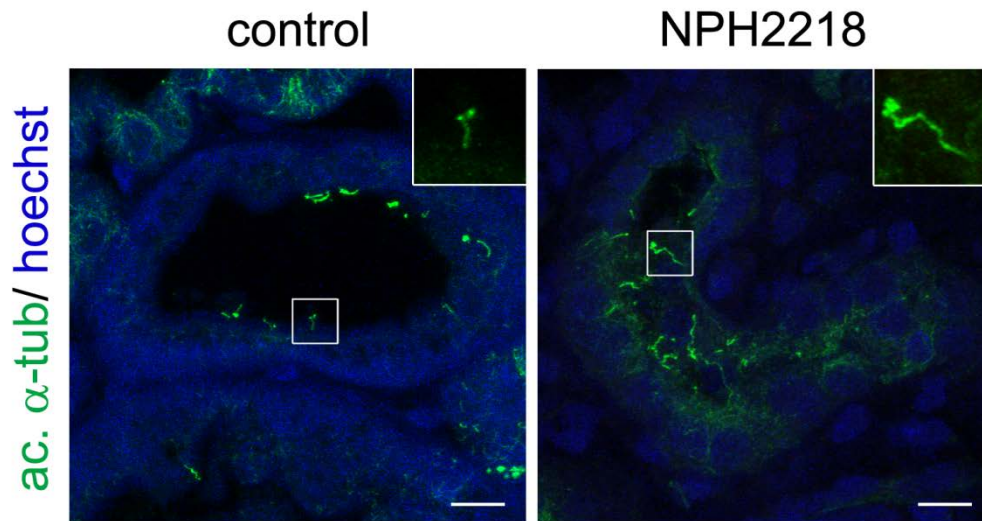

**Figure S3. Cilia of kidney tubules of individual NPH2218.** Paraffin-embedded kidney biopsy from control and individual NPH2218 were stained for acetylated alpha-tubulin. Cilia of the remaining tubules from individual NPH2218 appear not shortened, but even slightly elongated compared to control. Scale bar: 10 $\mu$ m.



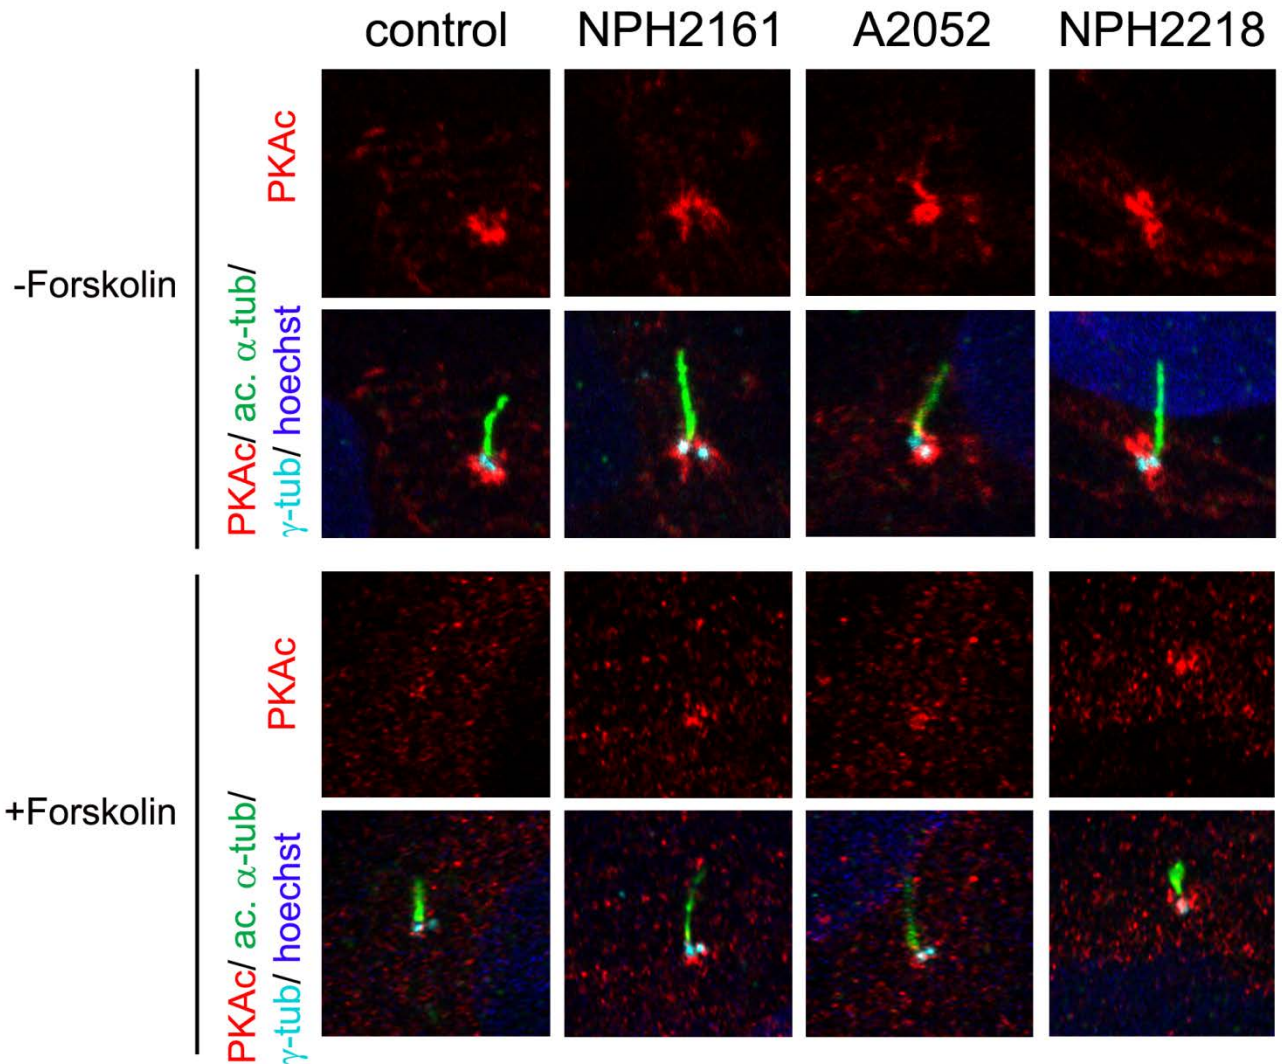

**Figure S4. Abnormal PKAc redistribution in human fibroblasts from affected individuals after forskolin treatment.** Control and mutant fibroblasts from individuals NPH2161, A2052 and NPH2218 were starved for 48hrs to induce ciliogenesis, treated with the adenylyl cyclase activator Forskolin for 1hr and then fixed with MetOH. Co-staining of PKA catalytic subunits (PKAc) using a mouse monoclonal antibody (BD Biosciences, 1:100), ARL13B and gamma-tubulin were performed and images were recorded with a SP8 confocal microscope and analyzed with ImageJ. As previously reported (Tuson *et al.* 2011), PKAc localizes at the base of the cilium in untreated cells. Following activation of adenylyl cyclase, PKAc is redistributed in the cytoplasm of control fibroblasts (as shown in Barzi *et al.* 2009) while an abnormal accumulation of PKAc remained at the base of the cilium in mutant fibroblasts, suggesting a defective PKA/adenylyl cyclase signaling pathway.

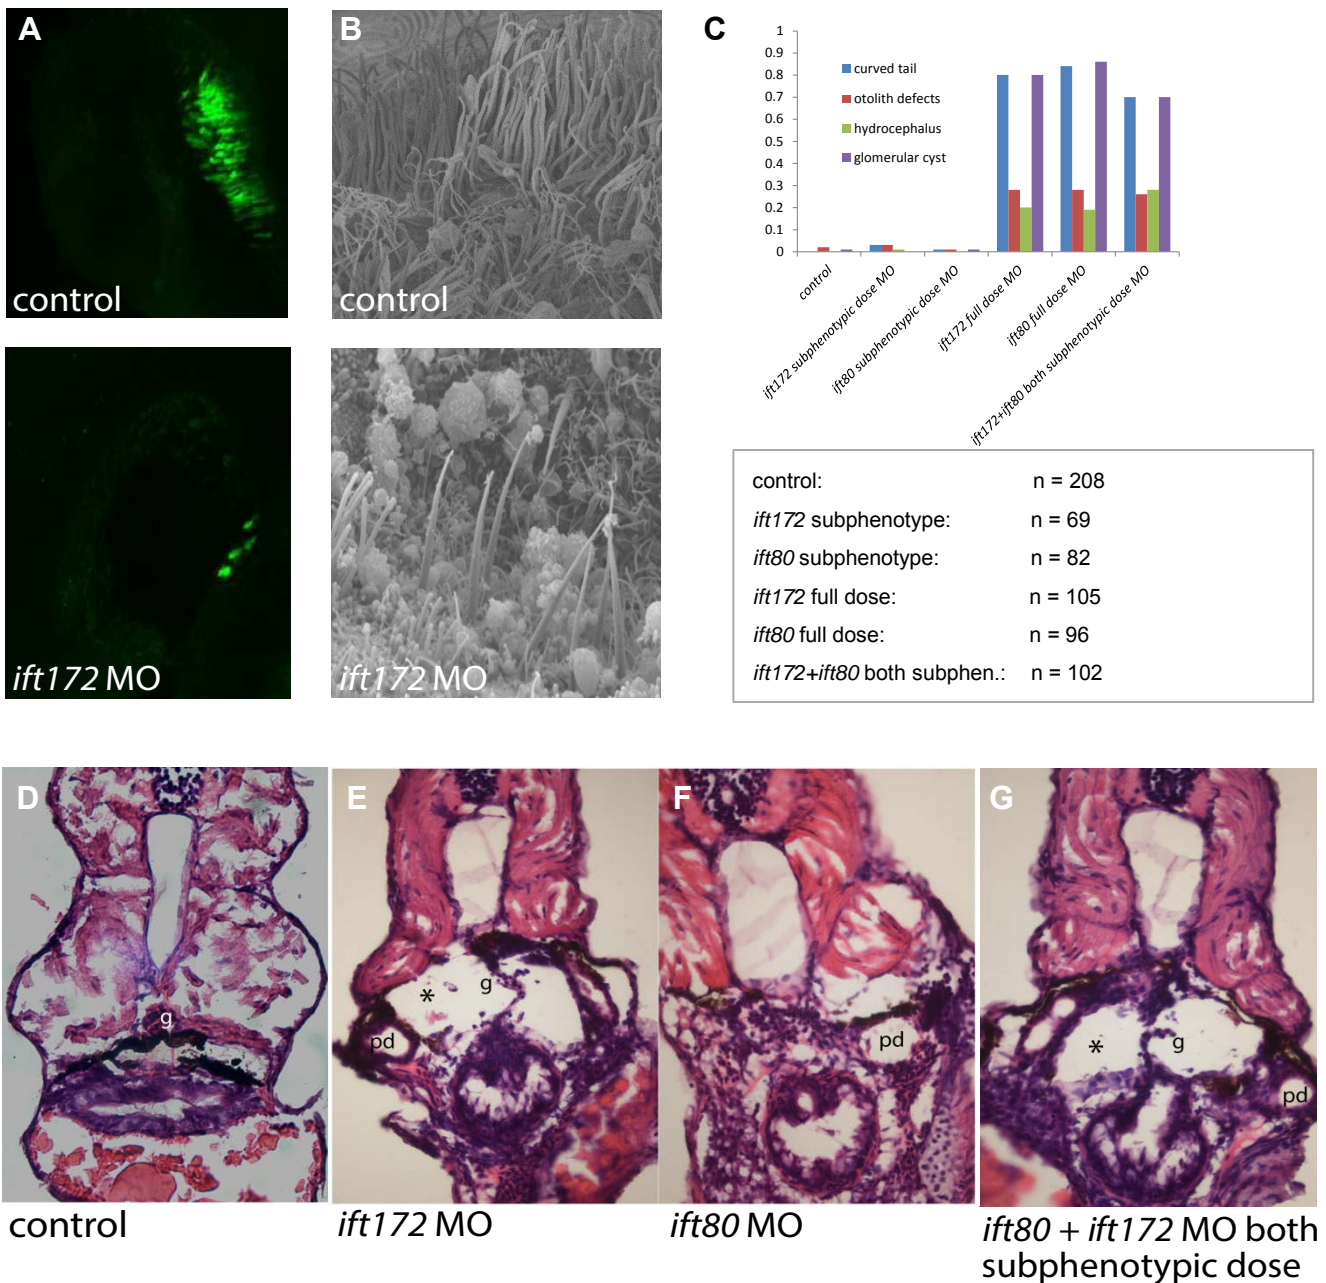

**Figure S5. Knockdown of *ift172* in zebrafish.** (A) Knockdown of *ift172* in a rhodopsin:GFP transgenic zebrafish line, shows retinal dystrophy at 4 dpf. (B) Scanning EM of olfactory pits in *ift172* morphants exhibits ciliogenesis defects. (C) Bar graph shows quantitative phenotypic findings after injection of each MO. (D-G) Zebrafish histology (zf-sections) of control (D), *ift172* (E) and *ift80* (F) morphants as well as in morphants with the combined infection of subphenotypic doses of *ift172* and *ift80* (G). Dilatation of pronephric duct (pd) and occurrence of kidney cysts, as indicated by (\*) in the two full dose morphants as well as in the morphant with the combined injection of *ift172* and *ift80*, when compared to control (g = glomerulus).

**Table S1. 14 genes, encoding IFT-B components, included in mutation analysis in 1,056 individuals with NPHP-RC at University of Michigan.**

| <b>No</b> | <b>Gene symbol</b>           | <b>Gene name</b>                                       | <b>Accession</b> | <b>Locus</b>                  | <b># Exons</b> |
|-----------|------------------------------|--------------------------------------------------------|------------------|-------------------------------|----------------|
| 1         | <b><i>IFT172/SLB</i></b>     | intraflagellar transport 172 homolog (Chlamydomonas)   | NM_015662.1      | chr2:27,667,241-27,712,571    | 48             |
| 2         | <b><i>IFT88</i></b>          | intraflagellar transport 88 homolog (Chlamydomonas)    | NM_175605.3      | chr13:21,141,208-21,265,576   | 26             |
| 3         | <b><i>IFT80</i></b>          | intraflagellar transport 80 homolog (Chlamydomonas)    | NM_020800.2      | chr3:159,976,255-160,102,434  | 19             |
| 4         | <b><i>IFT46</i></b>          | intraflagellar transport 46 homolog (Chlamydomonas)    | NM_020153.3      | chr11:118,415,243-118,436,791 | 11             |
| 5         | <b><i>IFT52</i></b>          | intraflagellar transport 52 homolog (Chlamydomonas)    | NM_016004.2      | chr20:42,219,579-42,275,861   | 14             |
| 6         | <b><i>IFT57/HIPPI</i></b>    | intraflagellar transport 57 homolog (Chlamydomonas)    | NM_018010.3      | chr3:107,879,659-107,941,417  | 11             |
| 7         | <b><i>IFT74/CCDC2</i></b>    | intraflagellar transport 74 homolog (Chlamydomonas)    | NM_001099222.1   | chr9:26,956,371-27,062,931    | 19             |
| 8         | <b><i>IFT81/CDV1</i></b>     | intraflagellar transport 81 homolog (Chlamydomonas)    | NM_001143779.1   | chr12:110,562,140-110,656,600 | 18             |
| 9         | <b><i>RABL5/IFT22</i></b>    | RAB, member RAS oncogene family-like 5                 | NM_022777.2      | chr7:100,956,648-100,965,093  | 5              |
| 10        | <b><i>TRAF3IP1/IFT54</i></b> | TNF receptor-associated factor 3 interacting protein 1 | NM_015650.3      | chr2:239,229,185-239,309,541  | 17             |
| 11        | <b><i>HSPB11/IFT25</i></b>   | heat shock protein family B (small), member 11         | NM_016126.2      | chr1:54,387,234-54,411,288    | 4              |
| 12        | <b><i>IFT20</i></b>          | intraflagellar transport 20 homolog                    | NM_174887.2      | chr17:26,655,353-26,662,495   | 5              |
| 13        | <b><i>IFT27</i></b>          | intraflagellar transport 27 homolog                    | NM_001177701.2   | chr22:37,154,246-37,172,172   | 7              |
| 14        | <b><i>TTC30B/IFT70</i></b>   | tetratricopeptide repeat domain 30B                    | NM_152517.2      | chr2:178,414,886-178,417,524  | 1              |

**Table S2. Whole exome sequencing; final evaluation sheet of individual UCL-87.**

| FAMILY NAME | Gene          | hg19           | Accession #    | Nt change c.      | AA change p.         | Zygotity | Conservation |    |    |    |    |    |    | Poly 2 (Hum Var) | Mut Taster | SIFT Score | 1000-Genomes | EVS | Coverage | Biobase          | Hom Peak |
|-------------|---------------|----------------|----------------|-------------------|----------------------|----------|--------------|----|----|----|----|----|----|------------------|------------|------------|--------------|-----|----------|------------------|----------|
|             |               |                |                |                   |                      |          | Mm           | Gg | Xt | Dr | Ci | Ce | Dm |                  |            |            |              |     |          |                  |          |
| UCL 87      | <b>IFT172</b> | chr2:27700177  | NM_015662.1    | c.1232T>A         | p.Ile411Asn          | Hom.     | I            | I  | I  | I  | I  | I  | I  | 0.89             | DC         | DC         | NA           | NA  | 165      | no               | yes      |
|             | <b>ERCC6</b>  | chr10:50679075 | NM_000124.3    | c.3016A>T         | p.Thr1006Ser         | Hom.     | T            | T  | -  | T  | T  | R  | -  | 0.69             | DC         | DC         | NA           | NA  | 186      | Yes <sup>a</sup> | yes      |
|             | <b>PDE11A</b> | chr2:178494176 | NM_001077197.1 | c.2011_2012insGGG | p.Ser671delinsTrpAla | Hom.     | D            | E  | Y  | I  | R  | Q  | -  | ND               | benign     | ND         | rs67772336*  | NA* | 123      | Yes <sup>b</sup> | no       |

a) ERCC6 (excision repair cross-complementing rodent repair deficiency, complementation group 6): gene is listed in Biobase as causing Cockayne Syndrome (#MIM133540), ref.24), this variant is not listed. b) PDE11A (phosphodiesterase 11A): gene is listed in Biobase as causing adrenocortical dysplasia and adenoma (PPNAD2, #MIM 610475, ref.23), this variant is not listed. \*region is surrounded by known SNPs with three bp insertions.

be, Benign; Ce, Caenorhabditis elegans; Ci, Ciona intestinalis; DC, Disease-causing; Dm, Drosophila melanogaster; Dr, Danio rerio; Gg, Gallus gallus; Hom, homozygous; Hom Peak, variant is within a homozygous stretch; Mm, Mus musculus; NA, Not applicable; ND, No data; Xt, xenopus tropicalis.

## References

- Horvath, A., Boikos, S., Giatzakis, C., Robinson-White, A., Groussin, L., Griffin, K.J., Stein, E., Levine, E., Delimpasi, G., Hsiao, H.P., et al. (2006). A genome-wide scan identifies mutations in the gene encoding phosphodiesterase 11A4 (PDE11A) in individuals with adrenocortical hyperplasia. *Nat. Genet.* 38, 794-800.
- Troelstra, C., van Gool, A., de Wit, J., Vermeulen, W., Bootsma, D., and Hoeijmakers, J.H.J. (1992). ERCC6, a member of a subfamily of putative helicases, is involved in Cockayne's syndrome and preferential repair of active genes. *Cell* 71, 939-953.

**Table S3. Summary of identified variants for SKDP-165.3 and SKDP-44.3**

|                                                                                                                                                                                                        | <b>SKDP-165.3</b>                                                                                                                                 | <b>SKDP-44.3</b>                                                                         |
|--------------------------------------------------------------------------------------------------------------------------------------------------------------------------------------------------------|---------------------------------------------------------------------------------------------------------------------------------------------------|------------------------------------------------------------------------------------------|
| <b>Number of variants identified (minor allele freq 0.05 or lower)</b>                                                                                                                                 | 39866                                                                                                                                             | 61520                                                                                    |
| <b>Number of variants after QC, including coverage filters and correction for platform and alignment artefacts</b>                                                                                     | 1985                                                                                                                                              | 1819                                                                                     |
| <b>Nonsynonymous SNPs or indels in exons or splice sites after QC</b>                                                                                                                                  | 1023                                                                                                                                              | 1061                                                                                     |
| <b>Rare (MAF &lt;0.001) variants after filtering as above</b>                                                                                                                                          | 262                                                                                                                                               | 283                                                                                      |
| <b>≥2 variants per gene, after filtering as above</b>                                                                                                                                                  | 37                                                                                                                                                | 18                                                                                       |
| <b>Remaining variants filtered as above, not predicted to be benign by Polyphen</b>                                                                                                                    | 29<br>(7 genes ≥ 2 hits<br><i>IFT172</i> ,<br><i>STXBP5L</i> ,<br><i>CLDN1</i> , <i>TRIM5</i> ,<br><i>DNAH3</i> , <i>FHOD3</i> ,<br><i>DRG1</i> ) | 17<br>(4 Gene ≥ 2 hits<br><i>IFT172</i> , <i>DNAH6</i> ,<br><i>MYO7B</i> , <i>SMG1</i> ) |
| <b>Number of genes with rare (MAF&lt;0.001) nonsynonymous SNPs and indels in exons or splice sites after QC with ≥2 variants predicted to be damaging by Polyphen, reported in Ciliome<sup>1</sup></b> | 4<br>( <i>IFT172</i> ,<br><i>STXBP5L</i> ,<br><i>DNAH3</i> , <i>DRG1</i> )                                                                        | 3<br>( <i>IFT172</i> , <i>DNAH6</i> ,<br><i>SMG1</i> )                                   |
| <b>Number of genes as above, with appropriate segregation of variants within the family</b>                                                                                                            | 2<br>( <i>IFT172</i> ,<br><i>STXBP5L</i> )                                                                                                        | 1<br>( <i>IFT172</i> )                                                                   |

\*MAF – minor allele frequency; QC – quality control

#### Reference

1. Inglis, P.N., Boroevich, K.A., and Leroux, M.R. (2006). Piecing together a ciliome. Trends in genetics : TIG 22, 491-500.

**Table S4. Summary statistics for mapping and coverage for SKDP-165.3 and SKDP-44.3.**

|                                                 | <b>SKDP-165.3</b> | <b>SKDP-44.3</b> |
|-------------------------------------------------|-------------------|------------------|
| <b>Total bases</b>                              | 3902939063        | 5165816727       |
| <b>Bases on target exons (+/-200bp)</b>         | 3178163279        | 4086677612       |
| <b>Bases on target exons</b>                    | 2274600176        | 2771959624       |
| <b>% bases on target exons (+/- 200bp)</b>      | 81                | 79               |
| <b>% bases on target exons</b>                  | 58                | 54               |
| <b>Target exon median base coverage</b>         | 35                | 40               |
| <b>Target exon mean base coverage</b>           | 40                | 44               |
| <b>% target exon bases with coverage &gt;1</b>  | 94                | 94               |
| <b>% target exon bases with coverage &gt;5</b>  | 89                | 92               |
| <b>% target exon bases with coverage &gt;10</b> | 83                | 88               |
| <b>% target exon bases with coverage &gt;15</b> | 75                | 83               |
